# Supplementary material
Source: PubMed Central journal article supplement (PMC4503467)
Supplement: NIHMS317976-supplement-1_si_001.pdf [file NIHMS317976-supplement-1_si_001.pdf]

# Supporting Information

## ESTYBON® (ON 01910.Na)-A Clinical Stage Multi Kinase Inhibitor: Synthesis, Structure

### Activity Relationship and Biological Activity.

M.V. Ramana Reddy<sup>1\*</sup>, Padmavathi Venkatapuram<sup>1#</sup>, Muralidhar R Mallireddigari<sup>2#</sup>, Venkat R Pallela<sup>2#</sup>, Stephen C Cosenza<sup>1</sup>, Kimberly A Robell<sup>1</sup>, Balaiah Akula<sup>2</sup>, Benjamin S Hoffman<sup>1</sup> and E. Premkumar Reddy<sup>1\*</sup>

#### Table of contents

|                                                                                                                             |    |
|-----------------------------------------------------------------------------------------------------------------------------|----|
| <b>Table S1.</b> Combustion analysis data for intermediates <b>2a-g, 4a-g, 5a-g, 6a-g, 9, 11-15, 19.</b>                    | S2 |
| <b>Table S2.</b> Combustion analysis data for final <b>8a-z, 8aa- ac</b> molecules.                                         | S3 |
| <b>Table S3.</b> Combustion analysis data for sulfides and sulfoxides <b>17, 20, 21, 24.</b>                                | S4 |
| <b>Table S4.</b> Combustion analysis data for amino esters ( <b>26a-l</b> ) and amino acids ( <b>27a-l</b> ) and <b>28.</b> | S5 |

Table S1: Combustion analysis data for intermediates **2a-g**, **4a-g**, **5a-g**, **6a-g**, **9**, **11-15**, **19**.

| Compound (#<br>from text) | Theoretical |      |       | Found |      |       |
|---------------------------|-------------|------|-------|-------|------|-------|
|                           | C           | H    | N     | C     | H    | N     |
| 2a                        | 39.05       | 3.28 | 5.69  | 38.96 | 3.26 | 5.65  |
| 2b                        | 39.05       | 3.28 | 5.69  | 39.16 | 3.30 | 5.72  |
| 2c                        | 28.51       | 1.71 | 4.75  | 28.57 | 1.73 | 4.79  |
| 2d                        | 33.57       | 2.01 | 5.59  | 33.65 | 2.05 | 5.66  |
| 2e                        | 33.57       | 2.01 | 5.59  | 33.52 | 2.03 | 5.55  |
| 2f                        | 35.93       | 2.15 | 5.99  | 35.99 | 2.11 | 6.06  |
| 2g                        | 39.05       | 3.28 | 5.69  | 39.14 | 3.31 | 5.73  |
| 4a                        | 52.46       | 4.95 | 7.65  | 52.53 | 4.99 | 7.72  |
| 4b                        | 52.46       | 4.95 | 7.65  | 52.41 | 4.99 | 7.69  |
| 4c                        | 36.23       | 2.61 | 6.04  | 36.29 | 2.64 | 6.09  |
| 4d                        | 44.82       | 3.22 | 7.47  | 44.89 | 3.25 | 7.53  |
| 4e                        | 44.82       | 3.22 | 7.47  | 44.91 | 3.26 | 7.52  |
| 4f                        | 49.13       | 3.53 | 8.19  | 49.21 | 3.57 | 8.25  |
| 4g                        | 52.46       | 4.95 | 7.65  | 52.52 | 4.99 | 7.71  |
| 5a                        | 46.69       | 4.31 | 5.44  | 46.62 | 4.28 | 5.49  |
| 5b                        | 46.69       | 4.31 | 5.44  | 46.75 | 4.34 | 5.39  |
| 5c                        | 35.31       | 2.63 | 4.58  | 35.37 | 2.61 | 4.63  |
| 5d                        | 41.31       | 3.08 | 5.35  | 41.36 | 3.11 | 5.42  |
| 5e                        | 41.31       | 3.08 | 5.35  | 41.35 | 3.12 | 5.41  |
| 5f                        | 44.08       | 3.29 | 5.71  | 44.14 | 3.32 | 5.76  |
| 5g                        | 46.69       | 4.31 | 5.44  | 46.75 | 4.34 | 5.48  |
| 6a                        | 41.52       | 3.83 | 4.84  | 41.59 | 3.87 | 4.89  |
| 6b                        | 41.52       | 3.83 | 4.84  | 41.58 | 3.88 | 4.90  |
| 6c                        | 31.97       | 2.38 | 4.14  | 32.03 | 2.42 | 4.20  |
| 6d                        | 36.81       | 2.75 | 4.77  | 36.88 | 2.79 | 4.83  |
| 6e                        | 36.81       | 2.75 | 4.77  | 36.85 | 2.76 | 4.72  |
| 6f                        | 38.99       | 2.91 | 5.05  | 39.10 | 2.94 | 5.09  |
| 6g                        | 41.52       | 3.83 | 4.84  | 41.60 | 3.82 | 4.81  |
| 9                         | 48.23       | 4.55 | 7.03  | 48.31 | 4.52 | 7.08  |
| 11                        | 58.78       | 4.93 | 4.03  | 58.84 | 4.96 | 4.08  |
| 12                        | 33.34       | 4.35 | 12.96 | 33.42 | 4.38 | 12.88 |
| 13                        | 53.82       | 4.52 | 3.69  | 53.91 | 4.54 | 3.74  |
| 14                        | 53.53       | 5.02 | 3.67  | 53.48 | 5.05 | 3.72  |
| 15                        | 68.74       | 6.29 | -     | 68.82 | 6.33 | -     |
| 19                        | 37.53       | 3.44 | -     | 37.61 | 3.42 | -     |

Table S2: Combustion analysis data for final **8a-z**, **8aa- ac** molecules

| Compound<br>(# from text) | Theoretical |      |      | Found |      |      |
|---------------------------|-------------|------|------|-------|------|------|
|                           | C           | H    | N    | C     | H    | N    |
| 8a                        | 56.19       | 4.72 | 3.85 | 56.14 | 4.75 | 3.89 |
| 8b                        | 61.24       | 5.74 | 4.20 | 61.30 | 5.78 | 4.21 |
| 8c                        | 56.19       | 4.72 | 3.85 | 56.25 | 4.74 | 3.90 |
| 8d                        | 61.24       | 5.74 | 4.20 | 61.31 | 5.77 | 4.16 |
| 8e                        | 54.95       | 4.87 | 3.56 | 55.03 | 4.90 | 3.61 |
| 8f                        | 54.95       | 4.87 | 3.56 | 54.89 | 4.88 | 3.58 |
| 8g                        | 59.49       | 5.82 | 3.85 | 59.56 | 5.84 | 3.89 |
| 8h                        | 59.49       | 5.82 | 3.85 | 59.47 | 5.85 | 3.88 |
| 8i                        | 59.49       | 5.82 | 3.85 | 59.55 | 5.84 | 3.90 |
| 8j                        | 59.49       | 5.82 | 3.85 | 59.56 | 5.84 | 3.89 |
| 8k                        | 59.49       | 5.82 | 3.85 | 59.52 | 5.81 | 3.86 |
| 8l                        | 53.89       | 5.00 | 3.31 | 53.94 | 5.01 | 3.33 |
| 8m                        | 53.89       | 5.00 | 3.31 | 53.88 | 4.99 | 3.34 |
| 8n                        | 58.00       | 5.89 | 3.56 | 58.06 | 5.91 | 3.59 |
| 8o                        | 58.00       | 5.89 | 3.56 | 58.08 | 5.90 | 3.53 |
| 8p                        | 58.00       | 5.89 | 3.56 | 58.04 | 5.89 | 3.57 |
| 8q                        | 58.00       | 5.89 | 3.56 | 58.01 | 5.90 | 3.59 |
| 8r                        | 58.00       | 5.89 | 3.56 | 58.06 | 5.91 | 3.59 |
| 8s                        | 52.81       | 4.68 | 3.42 | 52.86 | 4.69 | 3.45 |
| 8t                        | 56.98       | 5.58 | 3.69 | 57.06 | 5.60 | 3.73 |
| 8u                        | 56.76       | 5.85 | 3.01 | 56.84 | 5.83 | 3.04 |
| 8v                        | 45.77       | 3.84 | 2.97 | 45.85 | 3.86 | 3.00 |
| 8w                        | 48.88       | 4.56 | 3.17 | 48.96 | 4.57 | 3.19 |
| 8x                        | 54.34       | 5.07 | 3.52 | 54.40 | 5.06 | 3.53 |
| 8y                        | 54.34       | 5.07 | 3.52 | 54.27 | 5.07 | 3.50 |
| 8z                        | 52.55       | 4.41 | 3.40 | 52.62 | 4.44 | 3.42 |
| 8aa                       | 56.68       | 5.29 | 3.67 | 56.62 | 5.31 | 3.68 |
| 8ab                       | 53.78       | 3.95 | 3.92 | 53.86 | 3.96 | 3.95 |
| 8ac                       | 53.78       | 3.95 | 3.92 | 53.76 | 3.95 | 3.94 |

Table S3: Combustion analysis data for sulfides and sulfoxides **17, 20, 21, 24**.

| Compound<br>(# from text) | Theoretical |      |      | Found |      |      |
|---------------------------|-------------|------|------|-------|------|------|
|                           | C           | H    | N    | C     | H    | N    |
| 17                        | 58.30       | 5.41 | 3.58 | 58.36 | 5.43 | 3.60 |
| 20                        | 56.01       | 5.20 | 3.44 | 56.09 | 5.22 | 3.46 |
| 21                        | 60.46       | 6.14 | 3.71 | 60.55 | 6.12 | 3.73 |
| 24                        | 63.13       | 6.41 | 3.88 | 63.20 | 6.40 | 3.90 |

Table S4: Combustion analysis data for amino esters (**26a-l**) and amino acids (**27a-l**) and **28**.

| Compound<br>(# from text) | Theoretical |      |      | Found |      |      |
|---------------------------|-------------|------|------|-------|------|------|
|                           | C           | H    | N    | C     | H    | N    |
| 26a                       | 56.76       | 5.85 | 3.01 | 56.81 | 5.87 | 3.03 |
| 26b                       | 56.76       | 5.85 | 3.01 | 56.78 | 5.86 | 3.03 |
| 26c                       | 57.61       | 6.10 | 2.92 | 57.70 | 6.11 | 2.93 |
| 26d                       | 57.61       | 6.10 | 2.92 | 57.67 | 6.10 | 2.91 |
| 26e                       | 52.69       | 5.02 | 2.79 | 52.75 | 5.01 | 2.80 |
| 26f                       | 51.78       | 4.91 | 2.63 | 51.72 | 4.92 | 2.64 |
| 26g                       | 58.40       | 6.33 | 2.84 | 58.47 | 6.31 | 2.85 |
| 26h                       | 62.09       | 5.77 | 2.59 | 62.15 | 5.76 | 2.60 |
| 26i                       | 60.10       | 5.40 | 2.50 | 60.18 | 5.41 | 2.52 |
| 26j                       | 58.38       | 5.25 | 2.43 | 58.31 | 5.26 | 2.44 |
| 26k                       | 54.20       | 4.87 | 2.26 | 54.29 | 4.88 | 2.27 |
| 26l                       | 60.93       | 5.82 | 2.45 | 61.00 | 5.81 | 2.47 |
| 27a                       | 55.86       | 5.58 | 3.10 | 55.94 | 5.56 | 3.12 |
| 27b                       | 55.86       | 5.58 | 3.10 | 55.88 | 5.58 | 3.11 |
| 27c                       | 56.76       | 5.85 | 3.01 | 56.84 | 5.83 | 3.02 |
| 27d                       | 56.76       | 5.85 | 3.01 | 56.78 | 5.86 | 3.01 |
| 27e                       | 51.74       | 4.76 | 2.87 | 51.82 | 4.78 | 2.88 |
| 27f                       | 50.86       | 4.66 | 2.70 | 50.94 | 4.66 | 2.71 |
| 27g                       | 57.61       | 6.10 | 2.92 | 57.70 | 6.09 | 2.91 |
| 27h                       | 61.47       | 5.54 | 2.65 | 61.55 | 5.55 | 2.65 |
| 27i                       | 59.44       | 5.17 | 2.57 | 59.51 | 5.17 | 2.58 |
| 27j                       | 57.70       | 5.02 | 2.49 | 57.80 | 5.01 | 2.51 |
| 27k                       | 53.47       | 4.65 | 2.31 | 53.41 | 4.67 | 2.32 |
| 27l                       | 60.31       | 5.60 | 2.51 | 60.40 | 5.61 | 2.50 |
| 28                        | 49.50       | 5.54 | 2.75 | 49.56 | 5.53 | 2.76 |
